# Supplementary material
Source: publisher figshare collection journal article supplement (https://acs.figshare.com/ndownloader/files/20109656)
Supplement: Supplementary file 1 [file 20109656]

# Supporting Information

## Directional liquid wicking in regular arrays of triangular posts

Ban-Yang Liu <sup>a,b</sup>, Ralf Seemann <sup>b</sup>, Li-Jen Chen <sup>a</sup>, and Martin Brinkmann <sup>b\*</sup>

(a) Department of Chemical Engineering, National Taiwan University, 10617 Taipei, Taiwan

(b) Experimental Physics, Saarland University, 66123 Saarbrücken, Germany

This supporting information comprises two pages, and contains one figure and one table. Figure S1 provides microscopy images of wicking experiments in a micro-fluidic cross. Table S1 summarizes the measured micro-pattern geometries of all samples used in our experiments.

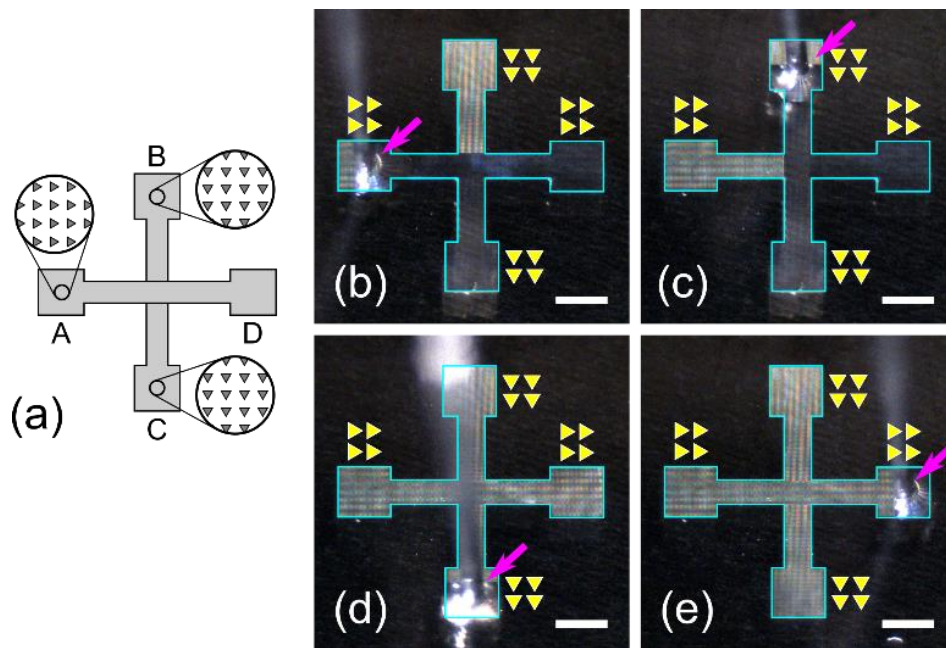

Figure S1. (a): Schematic illustration of two crossing channels with different tip orientations. The tip orientation of the triangular posts right in the junction is identical to that of position A. (b): Liquid deposited on patch A will be wicked to patch C and D but at the same time does not reach to patch B. (c): Liquid deposited on patch B will be wicked to patch C and D but at the same time does not reach to patch A. (d): Liquid deposited on patch C, the liquid forms a sessile drop and no wicking is observed. (e): Liquid deposited on patch D, the liquid forms a sessile drop and no wicking is observed. The scale bar represents 1.0 mm.

Table S1: Geometry parameters of micro-pattern and the observed directional wicking displayed in Figures of the main text and in Fig. S1 of this supporting information.

| Figure        | Note                               | w<br>( $\mu\text{m}$ ) | c<br>( $\mu\text{m}$ ) | r<br>( $\mu\text{m}$ ) | h<br>( $\mu\text{m}$ ) | LLF   | VLF   | AR   |
|---------------|------------------------------------|------------------------|------------------------|------------------------|------------------------|-------|-------|------|
| <b>1 (a)</b>  | Confocal                           | 18.2                   | 39.9                   | 34.7                   | 47.5                   | 0.456 | 0.459 | 2.61 |
| <b>1 (b)</b>  | Directional wicking (Tip & Side)   | 18.4                   | 33.2                   | 28.8                   | 35.3                   | 0.553 | 0.578 | 1.92 |
| <b>3 (b)</b>  | Non-wicking                        | 18.7                   | 50.8                   | 44.0                   | 13.2                   | 0.367 | 0.377 | 0.71 |
| <b>3 (d)</b>  | All-directional wicking            | 18.6                   | 49.8                   | 43.3                   | 51.7                   | 0.374 | 0.379 | 2.78 |
| <b>11</b>     | Y-shape channel                    | 16.4                   | 28.6                   | 24.7                   | 27.1                   | 0.575 | 0.606 | 1.65 |
| <b>12 (a)</b> | Directional wicking (Tip)          | 17.4                   | 50.9                   | 19.6                   | 20.7                   | 0.342 | 0.840 | 1.19 |
| <b>12 (b)</b> | Directional wicking (Tip and Base) | 19.0                   | 50.8                   | 25.2                   | 32.3                   | 0.373 | 0.671 | 1.70 |
| <b>S1</b>     | X-shape channel                    | 17.2                   | 28.5                   | 24.7                   | 27.8                   | 0.605 | 0.614 | 1.62 |
